# Supplementary material
Source: PubMed Central journal article supplement (PMC4703316)
Supplement: NIHMS748427-supplement-MIB_suppl.pdf [file NIHMS748427-supplement-MIB_suppl.pdf]

## **Molecular Imaging & Biology**

### **Metabolism of Radiolabeled Methionine in Hepatocellular Carcinoma**

Yu Kuang<sup>1,3</sup>, Fangjing Wang<sup>2\*</sup>, David J. Corn<sup>1\*</sup>, Haibin Tian<sup>1</sup>, Zhenghong Lee<sup>1,2,ξ</sup>

1. Dept. of Radiology, University Hospitals Case Medical Center, Cleveland, OH 44106
2. Dept. of Biomedical Engineering, Case Western Reserve University, Cleveland, OH 44106
3. Medical Physics Program, University of Nevada Las Vegas, Las Vegas, NV, 89154

\*These authors have equally contributed to this study.

ξ Corresponding Author's Email: [zhenghong.lee@case.edu](mailto:zhenghong.lee@case.edu)

**A. L-[methyl-<sup>11</sup>C]-Methionine**

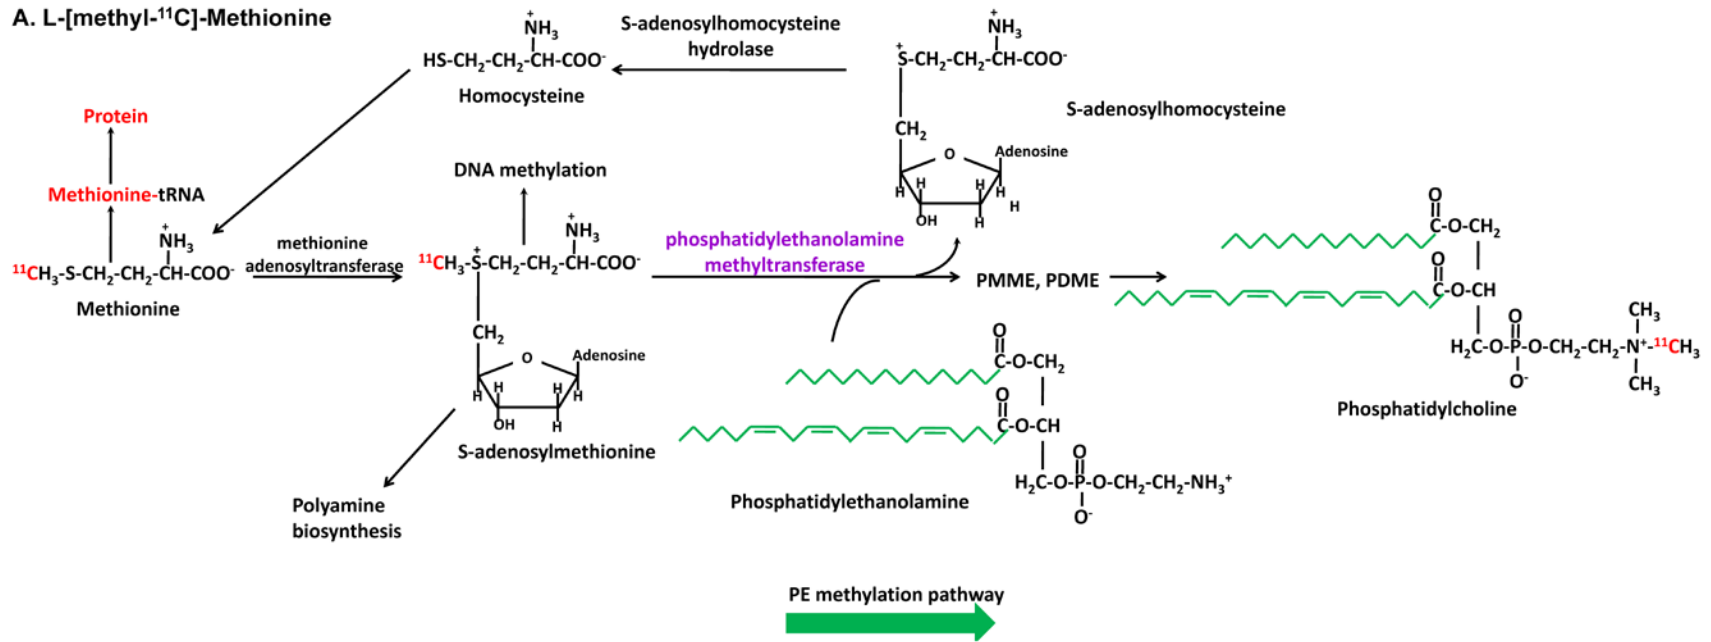

**B. L-[1-<sup>11</sup>C]-Methionine**

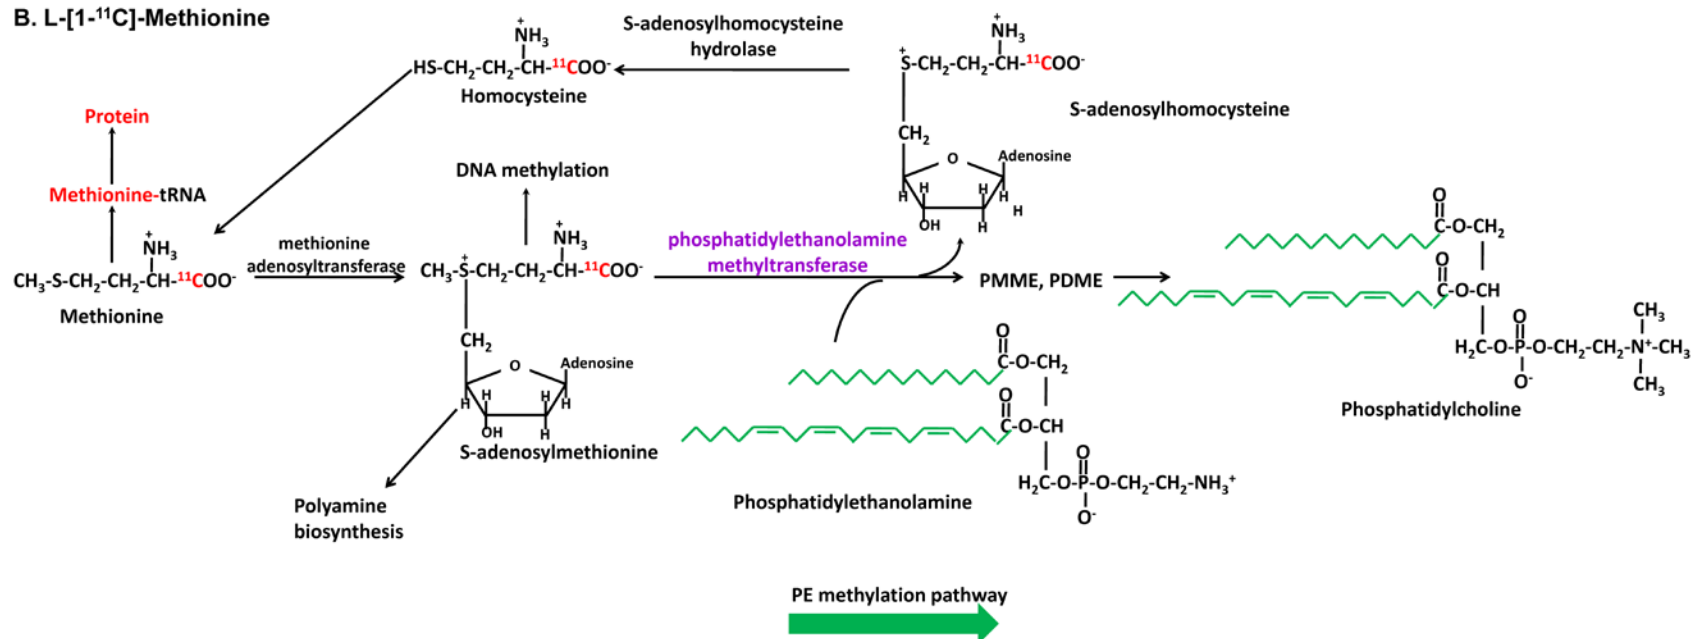

**Supplemental Figure 1. Radiolabeled methionine metabolism.** (A) L-[methyl-<sup>11</sup>C]-methionine. (B) L-[1-<sup>11</sup>C]-methionine.

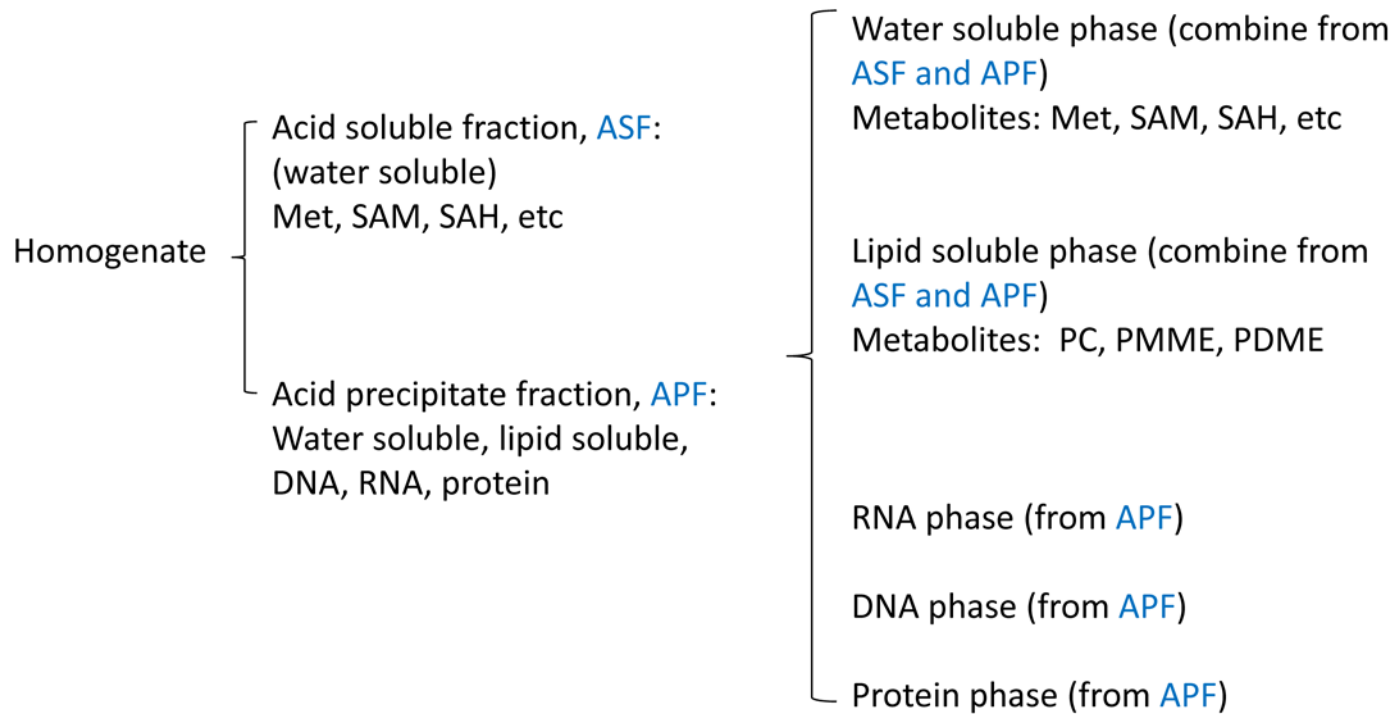

**Supplemental Figure 2. The radiolabeled metabolites derived from methionine.** **Met**: methionine, **SAM**: S-adenosylmethionine, **SAH**: S-adenosylhomocysteine, **PMME**: phosphatidylmonomethylethanolamine, **PDME**: phosphatidylmethylethanolamine, **PC**: phosphatidylcholine.

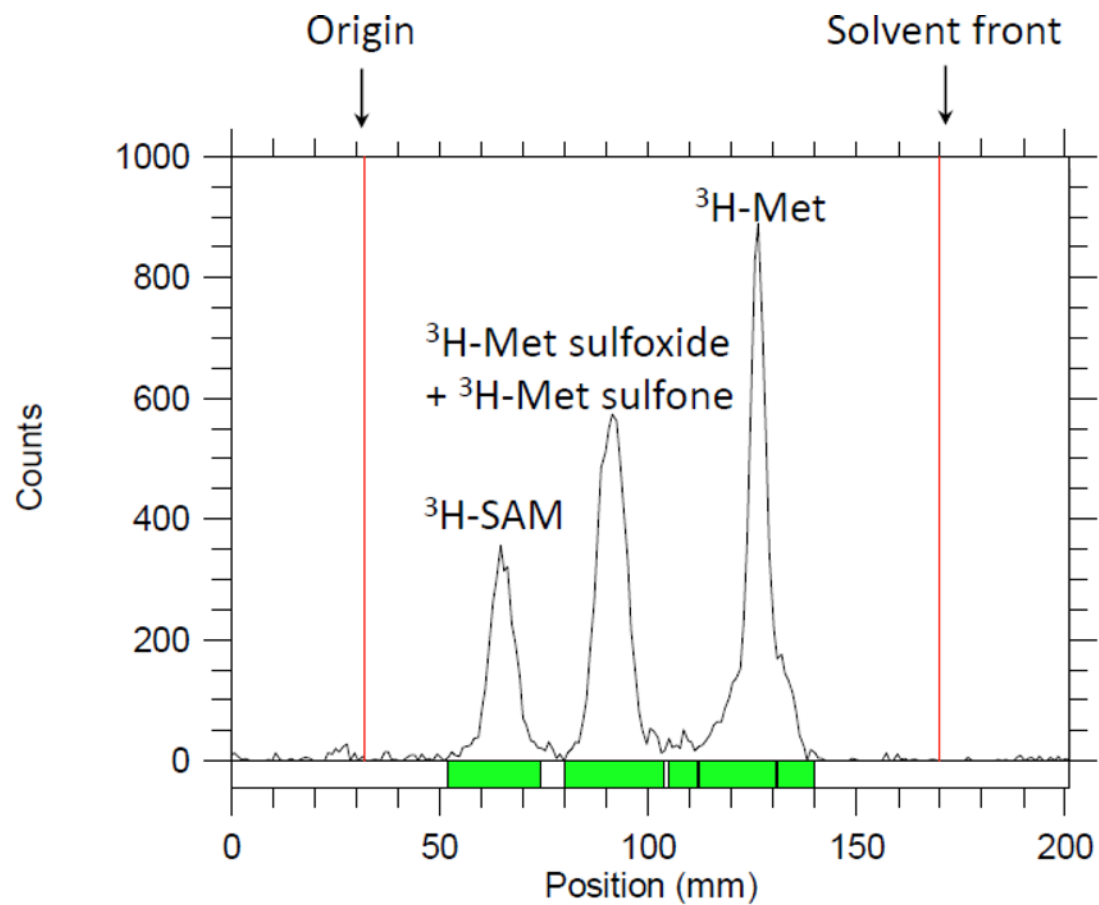

**Supplemental Figure 3. A representative radio-TLC chromatogram from the water soluble phase of WCH17 cells after pulsed with L-[methyl- $^3\text{H}$ ]-Met 5 min.**
